# Supplementary material
Source: PubMed Central journal article supplement (PMC9827555)
Supplement: EMBR-24-e54984-s004.pdf [file EMBR-24-e54984-s004.pdf]

## **Rassf7a promotes spinal cord regeneration and controls spindle orientation in neural progenitor cells**

Panpan Zhu<sup>1,2,3#</sup>, Pengfei Zheng<sup>1#</sup>, Xinlong Kong<sup>4</sup>, Shuo Wang<sup>1</sup>,  
Muqing Cao<sup>4\*</sup> and Chengtian Zhao<sup>1,2,3\*</sup>

<sup>1</sup>Institute of Evolution & Marine Biodiversity, Ocean University of China, Qingdao, 266003, China

<sup>2</sup>Laboratory for Marine Biology and Biotechnology, Qingdao National Laboratory for Marine Science and Technology, Qingdao, 266003, China

<sup>3</sup>Sars-Fang Centre, Ministry of Education Key Laboratory of Marine Genetics and Breeding, College of Marine Life Sciences, Ocean University of China, Qingdao 266003, China

<sup>4</sup>Key Laboratory of Cell Differentiation and Apoptosis of Chinese Ministry of Education, Department of Pathophysiology, Shanghai Jiao Tong University School of Medicine, Shanghai, China.

# These authors contributed equally.

\* Corresponding author

### **Supplementary Materials**

#### **Table of Contents**

|                                                                                                                           |           |
|---------------------------------------------------------------------------------------------------------------------------|-----------|
| <b>Appendix Figure S1. Expression pattern of <i>rassf7a</i> and <i>rassf7b</i> .....</b>                                  | <b>2</b>  |
| <b>Appendix Figure S2. Generation of <i>rassf7a</i> and <i>rassf7b</i> mutants .....</b>                                  | <b>3</b>  |
| <b>Appendix Figure S3. Spinal cords developed normally in <i>rassf7a</i> mutants .....</b>                                | <b>5</b>  |
| <b>Appendix Figure S4. Recovery defects of neural cells in <i>rassf7a</i> morphants after injury .....</b>                | <b>6</b>  |
| <b>Appendix Figure S5. Expression of <i>rassf7a</i> in the spinal cord at 24 hpf .....</b>                                | <b>8</b>  |
| <b>Appendix Figure S6. Rassf7a localizes to the centrosomes in zebrafish.....</b>                                         | <b>9</b>  |
| <b>Appendix Figure S7. Transcriptome analysis of differentially expressed genes during spinal cord regeneration .....</b> | <b>10</b> |
| <b>Appendix Table S1 .....</b>                                                                                            | <b>11</b> |
| <b>Appendix Table S2.....</b>                                                                                             | <b>12</b> |

## Appendix Figures

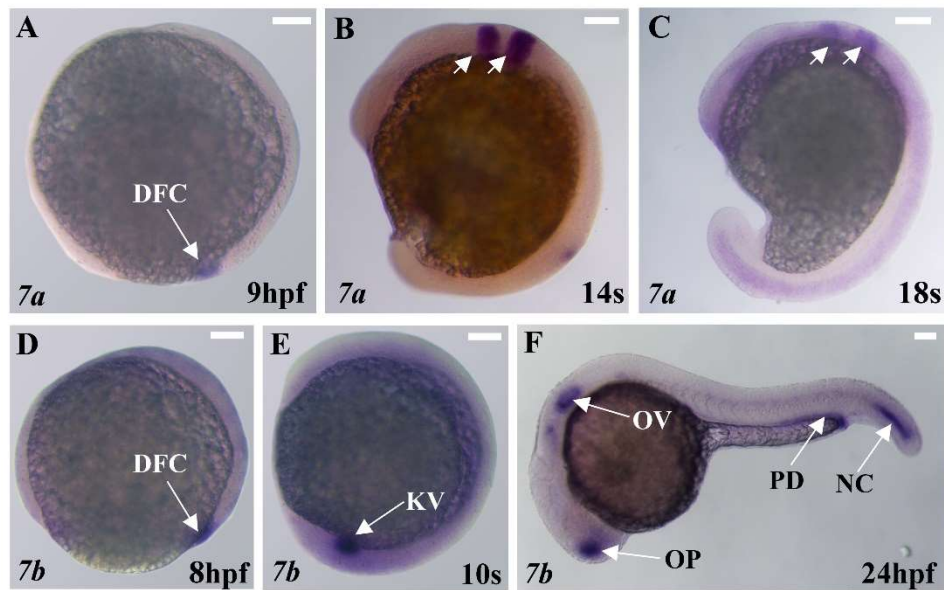

### Appendix Figure S1. Expression pattern of *rassf7a* and *rassf7b*

(A-C) Whole mount *in situ* hybridization results showing expression of *rassf7a* at different stages as indicated. (B) Double staining results showing the colocalization of *rassf7a* (purple) and *krox20* (red) in rhombomeres 3 and 5 at a 14-somite stage (14 s) embryo. (D-F) Whole mount *in situ* hybridization results showing expression of *rassf7b* at different stages as indicated. Arrowheads in (B, C) represent rhombomeres 3 and 5. DFC, dorsal forerunner cells; KV, kupffer's vesicle; NC, notochord; OP, olfactory pit; OV, otic vesicle; PD, pronephric duct. Scale bars: 100  $\mu$ m.

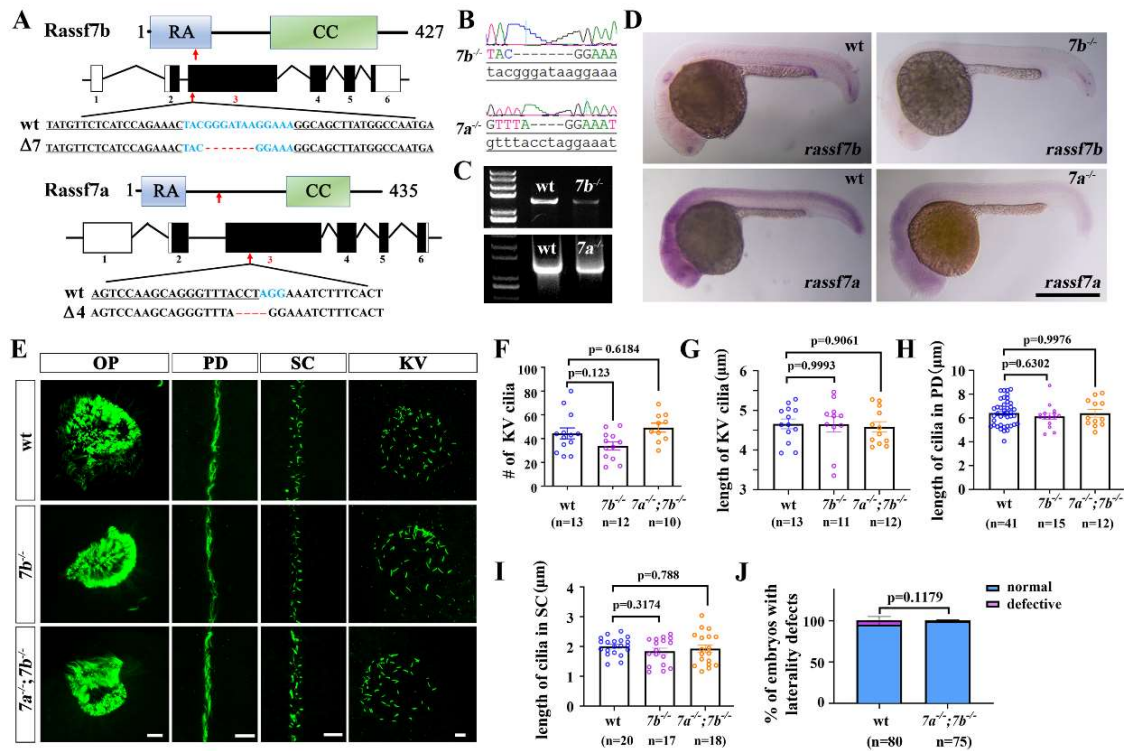

### Appendix Figure S2. Generation of *rassf7a* and *rassf7b* mutants

(A) Diagram showing the protein domains, genomic structures and sequences of wild-type and corresponding *rassf7b* (top) and *rassf7a* (bottom) mutants. Red arrows indicate mutation sites. Dark boxes indicate open reading frames. Underlined sequences indicate TALEN binding sites (top, *rassf7b*) or Cas9 binding sites (bottom, *rassf7a*). RA, Ras association domain; CC, coiled-coil domain. (B) Sanger sequencing results confirming the deletion of target region in *rassf7a* and *rassf7b* mutant transcripts. (C) PCR analysis showing the amplification of mutant transcripts from 24 hpf wild-type and mutant larvae as indicated. (D) Whole mount *in situ* hybridization results showing the expression of *rassf7a* and *rassf7b* in wild-type and mutant larvae as indicated. (E) Confocal images showing cilia in different tissues of wild-type and mutant larvae as indicated. Cilia were visualized with anti-acetylated tubulin antibody. (F) Dot plots showing the number of cilia in Kupffer's vesicle in wild-type and mutant embryos as indicated. (G-I) Dot plots showing length of cilia in different tissues as indicated. (J) Bar graph showing the percentages of embryos with laterality defects characterized by abnormal *lefty-2* expression in wild-type or *rassf7a*;*rassf7b* double mutants. *P* values for One-way ANOVA with Dunnett's test or Dunnett's T3 test (F-I) and Fisher's Exact

test (J) are indicated. Data are shown as mean  $\pm$  S.E.M. For detailed statistics, see Supplementary Table 2 (Table S2). Each experiment was performed independently 4 times. Each data point represents an individual fish. Scale bars: 500  $\mu\text{m}$  in (D), 10  $\mu\text{m}$  in (E).

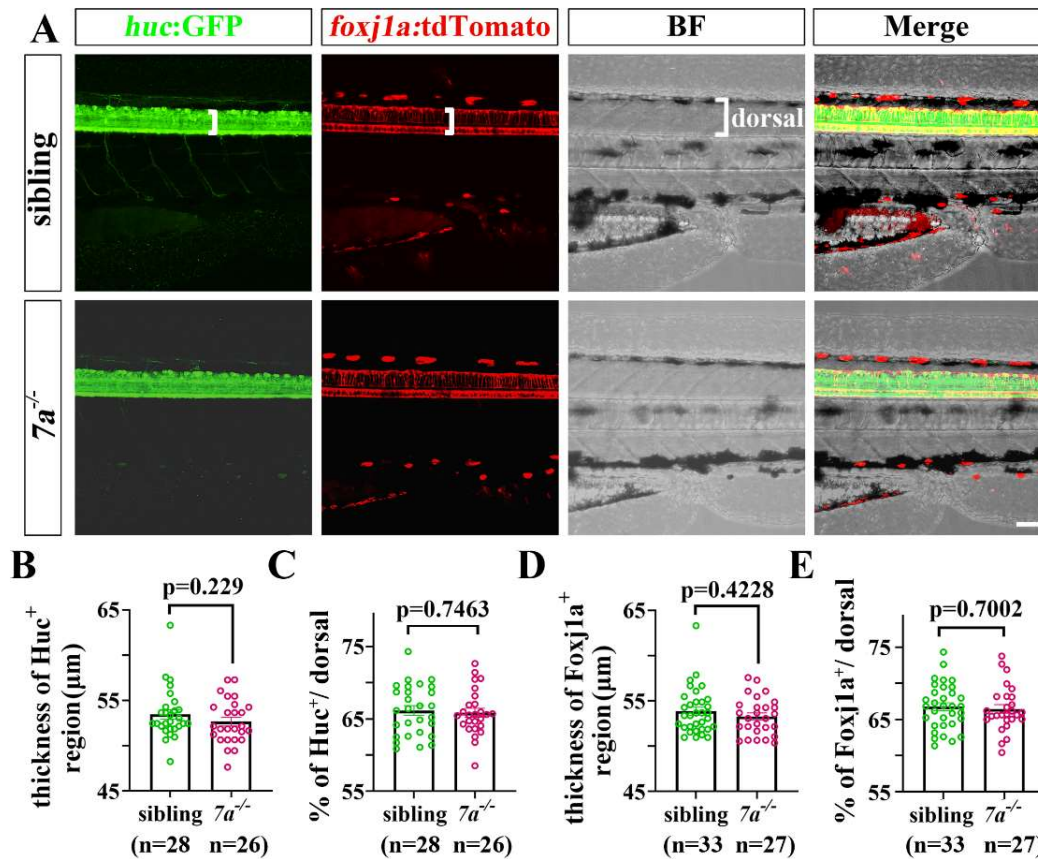

### Appendix Figure S3. Spinal cords developed normally in *rassf7a* mutants

(A) Representative images showing bright field and fluorescence signals of *rassf7a* mutants or siblings carrying Tg(*huc:GFP*) and Tg(*foxj1a:HA-tdTomato*) at 3 dpf. White brackets in fluorescence and bright field images indicate measurement regions of spinal cord and dorsal thickness respectively. (B, D) Dot plots showing the thickness of fluorescent regions as indicated in (A). (C, E) Dot graphs showing percentages of fluorescence thickness in *rassf7a* mutants or siblings as indicated. *P* values for unpaired Mann-Whitney test (B, D) and unpaired Student's *t*-test (C-E) are indicated. Data are shown as mean  $\pm$  S.E.M. Each data point represents an individual fish. Scale bars: 50  $\mu$ m in (A).

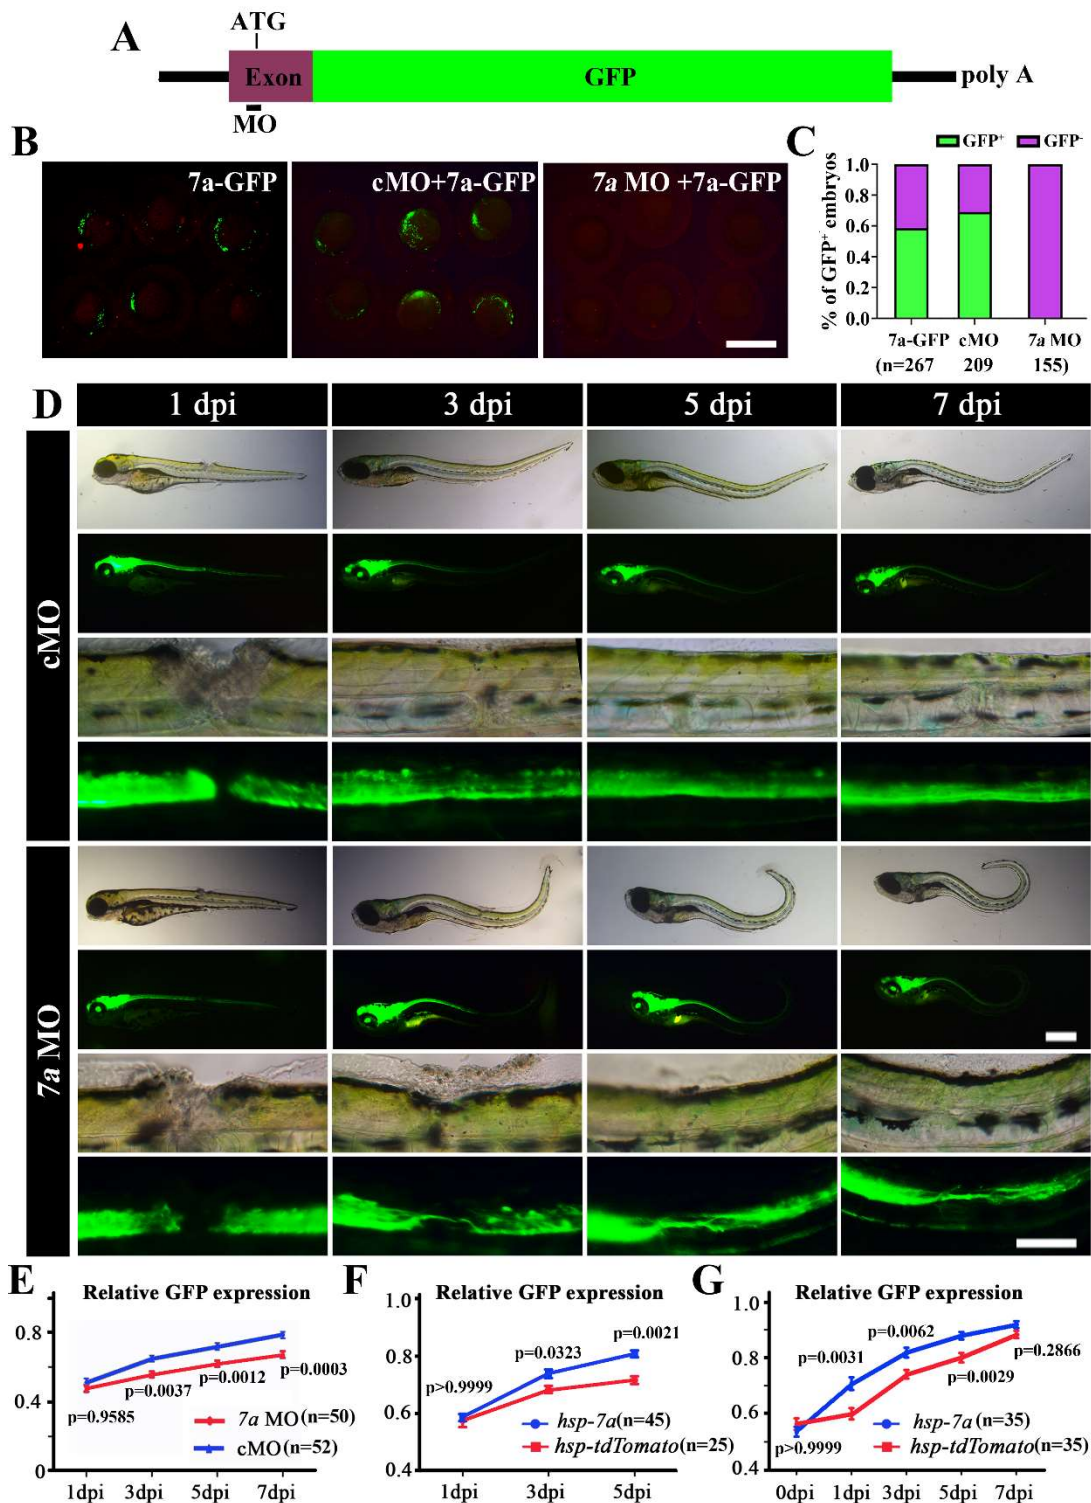

### Appendix Figure S4. Recovery defects of neural cells in *rassf7a* morphants after injury

(A) Diagram showing the construct used for detecting the efficiency of *rassf7a* morpholino, which binds to the same exon containing translational start site. (B) Images of 2-somite stage embryos injected with GFP reporter construct and control (cMO) or

*rassf7a* morpholino (*7a* MO) as indicated. (C) Bar graph showing the percentages of embryos with GFP fluorescent signals in different groups as indicated. (D) Representative images showing bright field and fluorescence images of control or *rassf7a* MO injected Tg(*huc:GFP*) transgenic larvae at different time points after SCI. The magnified views of the lesion sites were shown at the bottom. (E) Relative GFP expression level at the lesion sites in control or *rassf7a* morphants at different time points after injury. (F-G) Relative GFP expression level of the Tg(*huc:GFP*) transgene at the lesion sites of mutant (F) or wild-type larvae (G) overexpressed with *rassf7a* or *tdTomato* genes under heat shock promoters. *P* values for Two-way ANOVA with Bonferroni's multiple comparisons test (E-G) are indicated. Data are shown as mean  $\pm$  S.E.M. Each experiment was performed independently 3 times. Each data point represents an average of each group as indicated. Scale bars: 200  $\mu$ m in (B), 500  $\mu$ m in (D).

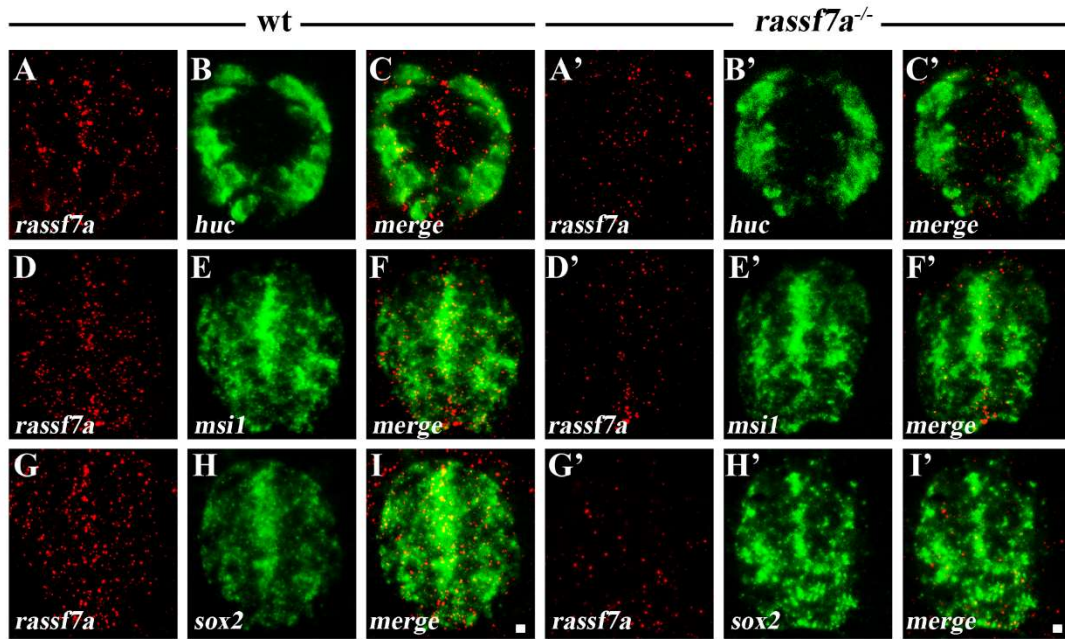

**Appendix Figure S5. Expression of *rassf7a* in the spinal cord at 24 hpf**

(A-I') Double fluorescent *in situ* hybridization results showing the expression of *rassf7a* (red) and different neural markers (green) on the cross sections through the spinal cord of 24 hpf wild-type (A-I) and mutant (A'-I') zebrafish larvae. Scale bars: 10  $\mu$ m.



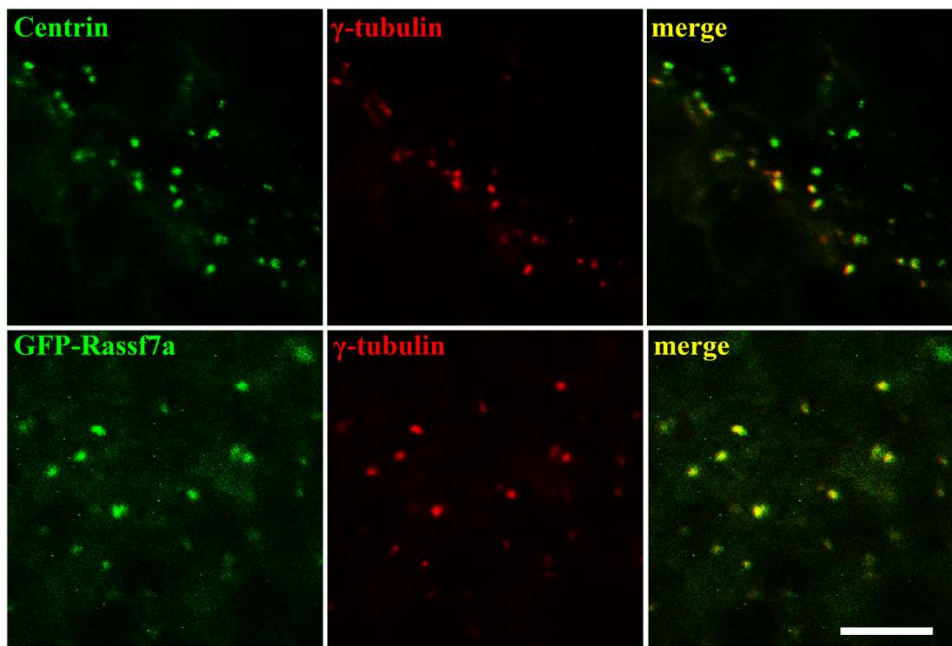

**Appendix Figure S6. Rassf7a localizes to the centrosomes in zebrafish**

Confocal images showing the colocalization analysis between Rassf7a and centrosomal markers. Zebrafish embryos were injected with either Centrin-GFP or GFP-Rassf7a constructs and stained with anti- $\gamma$ -tubulin antibodies (red) to label the centrosomes at 24 hpf. Scale bar: 10  $\mu$ m.

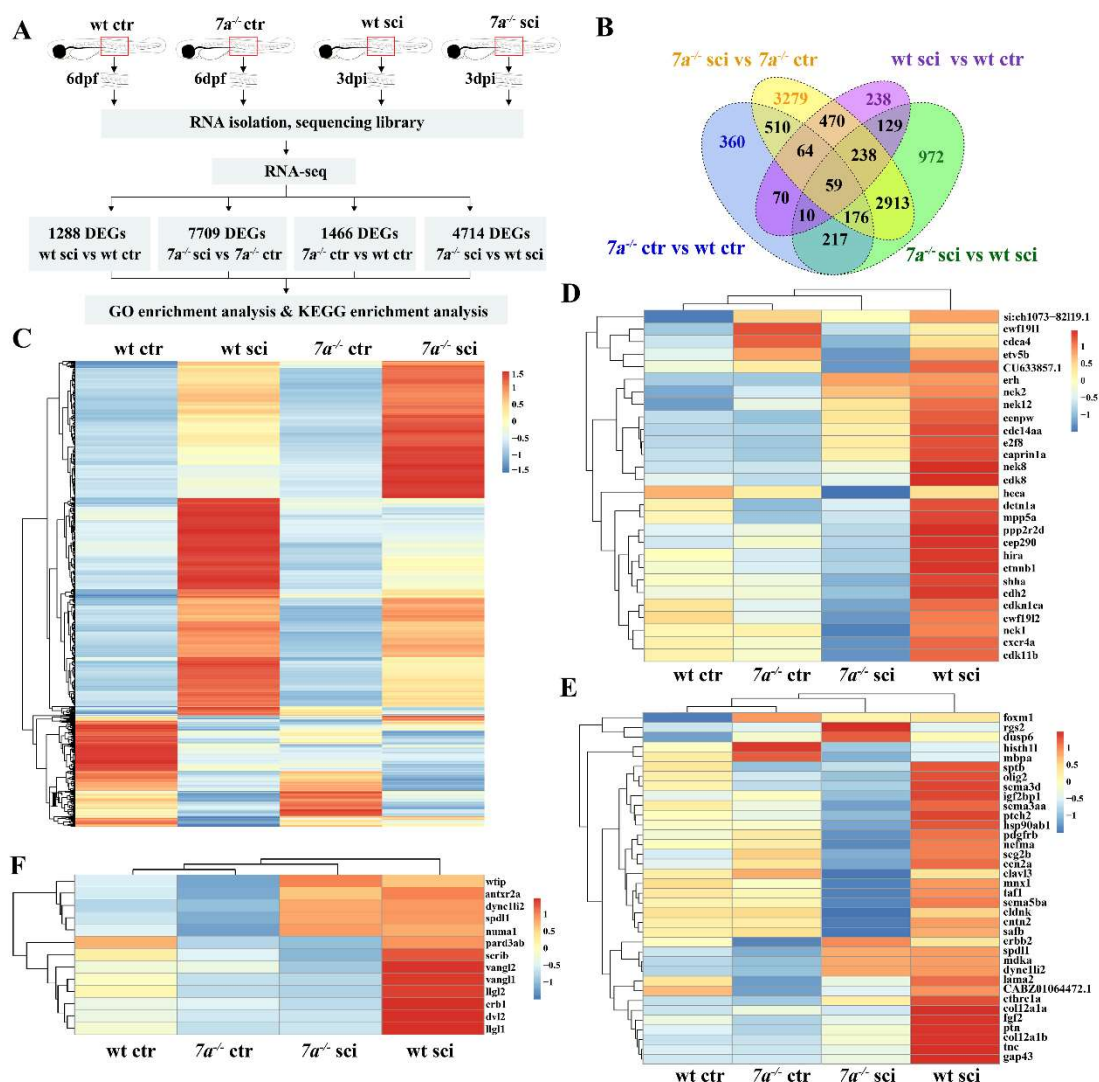

## Appendix Figure S7. Transcriptome analysis of differentially expressed genes during spinal cord regeneration

(A) Strategy used for total RNA isolation and transcriptome analysis. (B) Venn diagrams showing the number of DEGs in control and injured groups as indicated. (C) Heat map analysis of transcriptomic data from wild-type and *rassf7a* mutant embryos at 3 days after spinal cord injury. (D) Expression heat map of genes involved in mitotic process in wild-type and *rassf7a* mutant embryos. (E) Expression heat map of genes involved in axon elongation in wild-type and *rassf7a* mutant embryos. (F) Expression heat map of genes involved in cell polarity in wild-type and *rassf7a* mutants.

## Appendix Tables

### Appendix Table S1

| <b>Primer sequences used for mutant detection</b> |                               |                              |
|---------------------------------------------------|-------------------------------|------------------------------|
| Name                                              | Forward sequence              | Reverse sequence             |
| <i>rassf7a</i>                                    | 5'-CTGGTCGTTATGTTCTCATTG-3'   | 5'-GACTGTACACCTCCTCTTTAG-3'  |
| <i>rassf7b</i>                                    | 5'-TCATGTAGAGAGACCCCTTACTG-3' | 5'-TGCCCTTGTTGTGCGAAGAATC-3' |

  

| <b>Primers for <i>rassf7a</i> BP reaction</b> |                                                         |  |
|-----------------------------------------------|---------------------------------------------------------|--|
| Forward:                                      | GGGGACAAGTTTGTACAAAAAAGCAGGCTccaccATGAGAATCCAGACTTTATTA |  |
| Reverse:                                      | GGGGACCACTTTGTACAAGAAAGCTGGGTaCCGCCAAGACGTTTCCCTGGA     |  |

  

| <b>Primers for <i>rassf7a</i> MO efficacy verification</b> |                                                            |  |
|------------------------------------------------------------|------------------------------------------------------------|--|
| <i>rassf7a</i> Exon 2:                                     |                                                            |  |
| Forward:                                                   | 5'-ATCGATTTCGAATTCGCCACGAATCCAGACTTTATTATGTATTTCTGATCTG-3' |  |
| Reverse:                                                   | 5'-GCCCTTGCTCACCATAATGGCTTGGGCAAGTGCAATGACA-3'             |  |
| pCS2:                                                      |                                                            |  |
| Forward:                                                   | 5'-CCATTATGGTGAGCAAGGGC-3'                                 |  |
| Reverse:                                                   | 5'-CGTGGCGAATTCGAATCG-3'                                   |  |

  

| <b>Primers for probe synthesis</b> |                               |                              |
|------------------------------------|-------------------------------|------------------------------|
| Name                               | Forward sequence              | Reverse sequence             |
| <i>rassf7a</i>                     | 5'-GTAGTAGGCAAAACAAGAAG-3'    | 5'-TCAGATTCATTACCGCCAAG-3'   |
| <i>rassf7b</i>                     | 5'-TCATGTAGAGAGACCCCTTACTG-3' | 5'-GCTAATGAAATATATACGCAGG-3' |
| <i>huc</i>                         | 5'-GAAGACCTGCAAATCGAAGGAC-3'  | 5'-GAATGTACAGGGAGCTCAGTAG-3' |
| <i>sox2</i>                        | 5'-GGTGGGGTAGACTTTCAAGAA-3'   | 5'-CCAGCAGTGTAGTAAAAAGAG-3'  |
| <i>msi1</i>                        | 5'-CAAATGGAATCGGAAGGCAG-3'    | 5'-CTGTACCTGTCACTTGTTTC-3'   |

  

| <b>Primers for RT-PCR and qRT-PCR</b> |                               |                               |
|---------------------------------------|-------------------------------|-------------------------------|
| Name                                  | Forward sequence              | Reverse sequence              |
| <i>rassf7a</i>                        | 5'- GAGAAGACTTTGGGGAGGGCTG-3' | 5'- GGAATTGTTTGGCAGTGGGACG-3' |
| <i>rassf7b</i>                        | 5'- CGTTTGAAGAGGTGGATAAGGC-3' | 5'- GACCTCTGGATGAAGACTGGAC-3' |

## Appendix Table S2

## Detailed statistics

| Figure | Sample size                                   | Statistical test                      | Post-hoc Test                          | Comparison                                          | P value      |
|--------|-----------------------------------------------|---------------------------------------|----------------------------------------|-----------------------------------------------------|--------------|
| Fig 1I | wt: n=48, $7a^{-/-}$ : n=47                   | two-tailed unpaired Mann-Whitney test |                                        |                                                     | $P < 0.0001$ |
| Fig 1J | wt: n=48, $7a^{-/-}$ : n=47                   | two-tailed unpaired Mann-Whitney test |                                        |                                                     | $P < 0.0001$ |
| Fig 1K | wt: n=48, $7a^{-/-}$ : n=47                   | Two-way ANOVA                         | Bonferroni's multiple comparisons test | active: wt vs $7a^{-/-}$                            | $P < 0.0001$ |
|        |                                               |                                       |                                        | static: wt vs $7a^{-/-}$                            | $P < 0.0001$ |
| Fig 2B | wt: n=32, $7a^{-/-}$ : n=38                   | Two-way ANOVA                         | Bonferroni's multiple comparisons test | 0 dpi wt vs $7a^{-/-}$                              | $P > 0.9999$ |
|        |                                               |                                       |                                        | 1 dpi: wt vs $7a^{-/-}$                             | $P > 0.9999$ |
|        |                                               |                                       |                                        | 3 dpi: wt vs $7a^{-/-}$                             | $P = 0.1675$ |
|        |                                               |                                       |                                        | 5 dpi: wt vs $7a^{-/-}$                             | $P = 0.0766$ |
|        |                                               |                                       |                                        | 7 dpi: wt vs $7a^{-/-}$                             | $P > 0.9999$ |
| Fig 2C | wt: n=26, $7a^{-/-}$ : n=24                   | Two-way ANOVA                         | Bonferroni's multiple comparisons test | 0 dpi: wt vs $7a^{-/-}$                             | $P = 0.8965$ |
|        |                                               |                                       |                                        | 1 dpi: wt vs $7a^{-/-}$                             | $P = 0.0115$ |
|        |                                               |                                       |                                        | 3 dpi: wt vs $7a^{-/-}$                             | $P < 0.0001$ |
|        |                                               |                                       |                                        | 5 dpi: wt vs $7a^{-/-}$                             | $P < 0.0001$ |
|        |                                               |                                       |                                        | 7 dpi: wt vs $7a^{-/-}$                             | $P < 0.0001$ |
| Fig 3B | <i>huc</i> :GFP: wt: n=31, $7a^{-/-}$ : n=25  | two-tailed unpaired Student's t-test  |                                        | <i>huc</i> :GFP/wt vs <i>huc</i> :GFP/ $7a^{-/-}$   | $P < 0.0001$ |
|        | <i>gfap</i> :GFP: wt: n=49, $7a^{-/-}$ : n=37 | two-tailed unpaired Mann-Whitney test |                                        | <i>gfap</i> :GFP/wt vs <i>gfap</i> :GFP/ $7a^{-/-}$ | $P = 0.9326$ |
| Fig 3C | <i>huc</i> :GFP: wt: n=15, $7a^{-/-}$ : n=16  | two-tailed unpaired Student's t-test  |                                        | <i>huc</i> :GFP/wt vs <i>huc</i> :GFP/ $7a^{-/-}$   | $P = 0.0015$ |
|        | <i>gfap</i> :GFP: wt: n=24, $7a^{-/-}$ : n=21 | two-tailed unpaired Student's t-test  |                                        | <i>gfap</i> :GFP/wt vs <i>gfap</i> :GFP/ $7a^{-/-}$ | $P = 0.8505$ |
| Fig 3D | <i>huc</i> :GFP: wt: n=13, $7a^{-/-}$ : n=9   | two-tailed unpaired Student's t-test  |                                        | <i>huc</i> :GFP/wt vs <i>huc</i> :GFP/ $7a^{-/-}$   | $P = 0.9993$ |
|        | <i>gfap</i> :GFP: wt: n=32, $7a^{-/-}$ : n=36 | two-tailed unpaired Mann-Whitney test |                                        | <i>gfap</i> :GFP/wt vs <i>gfap</i> :GFP/ $7a^{-/-}$ | $P = 0.4144$ |
| Fig 3E | wt: n=13; $7a^{-/-}$ : n=9                    | Two-way ANOVA                         | Bonferroni's multiple                  | 1 dpi: wt vs $7a^{-/-}$                             | $P < 0.0001$ |

|        |                                                                           |                                                              |                                        |                        |            |
|--------|---------------------------------------------------------------------------|--------------------------------------------------------------|----------------------------------------|------------------------|------------|
|        |                                                                           |                                                              | comparisons test                       | 3dpi: wt vs $7a^{-/-}$ | $P=0.0048$ |
|        |                                                                           |                                                              |                                        | 5dpi: wt vs $7a^{-/-}$ | $P>0.9999$ |
| Fig 3F | wt: n=24; $7a^{-/-}$ : n=21                                               | Two-way ANOVA                                                | Bonferroni's multiple comparisons test | 1dpi: wt vs $7a^{-/-}$ | $P>0.9999$ |
|        |                                                                           |                                                              |                                        | 3dpi: wt vs $7a^{-/-}$ | $P>0.9999$ |
|        |                                                                           |                                                              |                                        | 5dpi: wt vs $7a^{-/-}$ | $P>0.9999$ |
| Fig 3H | wt: n=26; $7a^{-/-}$ : n=16                                               | two-tailed unpaired Student's t-test                         |                                        |                        | $P=0.0005$ |
| Fig 3I | wt: n=27; $7a^{-/-}$ : n=13                                               | two-tailed unpaired Student's t-test                         |                                        |                        | $P<0.0001$ |
| Fig 4P | Sox2 <sup>+</sup> : n=3 experiments<br>Huc <sup>+</sup> : n=3 experiments | two-tailed unpaired Student's t-test with Welch's correction |                                        |                        | $P<0.0001$ |
| Fig 4Q | ctr: n=3 experiments<br>injured: n=3 experiments                          | two-tailed unpaired Student's t-test with Welch's correction |                                        |                        | $P=0.8590$ |
| Fig 4R | ctr: n=3 experiments<br>injured: n=3 experiments                          | two-tailed unpaired Student's t-test with Welch's correction |                                        |                        | $P=0.0028$ |
| Fig 5C | wt: n=18 cells; $7a^{-/-}$ : n=17 cells                                   | two-tailed unpaired Student's t-test                         |                                        |                        | $P=0.0232$ |
| Fig 5F | wt: n=21 cells, N=14 fish<br>$7a^{-/-}$ : n=21 cells, N=23 fish           | two-tailed unpaired Mann-Whitney test                        |                                        |                        | $P=0.0002$ |
| Fig 6C | wt: n=38 cells, N=14 fish<br>$7a^{-/-}$ : n=49 cells, N=23 fish           | two-sided Fisher's Exact test                                |                                        |                        | $P=0.0021$ |
| Fig 6D | ctr MO: n=18 cells<br>$7a$ MO: n=30 cells                                 | two-sided Fisher's Exact test                                |                                        |                        | $P=0.006$  |
| Fig 7D | siControl: n=3 experiments<br>siRASSF7: n=3 experiments                   | two-tailed unpaired Student's t-test                         |                                        |                        | $P=0.0034$ |
| Fig 7G | siControl: n=4 experiments<br>siRASSF7: n=4 experiments                   | two-tailed unpaired Student's t-test                         |                                        |                        | $P=0.0013$ |
| Fig 7H | siControl: n=4 experiments,<br>siRASSF7: n=4 experiments                  | two-tailed unpaired Student's t-test                         |                                        |                        | $P=0.0006$ |

|         |                                                         |                                       |                                        |                                   |              |
|---------|---------------------------------------------------------|---------------------------------------|----------------------------------------|-----------------------------------|--------------|
| Fig 7J  | siControl: n=1737<br>siRASSF7: n=988                    | two-tailed unpaired Mann-Whitney test |                                        |                                   | $P < 0.0001$ |
| Fig 7K  | siControl: n=6 experiments<br>siRASSF7: n=6 experiments | two-sided Fisher's Exact test         |                                        |                                   | $P < 0.0001$ |
| Fig S2F | wt: n=13; $7b^{-/-}$ : n=12 $7a^{-/-};7b^{-/-}$ : n=10  | One-way ANOVA                         | Dunnett's test                         | wt vs $7b^{-/-}$                  | $P = 0.123$  |
|         |                                                         |                                       | Dunnett's test                         | wt vs $7a^{-/-};7b^{-/-}$         | $P = 0.6184$ |
| Fig S2G | wt: n=13; $7b^{-/-}$ : n=11; $7a^{-/-};7b^{-/-}$ : n=12 | One-way ANOVA                         | Dunnett's test                         | wt vs $7b^{-/-}$                  | $P = 0.9993$ |
|         |                                                         |                                       | Dunnett's test                         | wt vs $7a^{-/-};7b^{-/-}$         | $P = 0.9061$ |
| Fig S2H | wt: n=41; $7b^{-/-}$ : n=15; $7a^{-/-};7b^{-/-}$ : n=12 | One-way ANOVA                         | Dunnett's test                         | wt vs $7b^{-/-}$                  | $P = 0.6302$ |
|         |                                                         |                                       | Dunnett's test                         | wt vs $7a^{-/-};7b^{-/-}$         | $P = 0.9976$ |
| Fig S2I | wt: n=20; $7b^{-/-}$ : n=17; $7a^{-/-};7b^{-/-}$ : n=18 | One-way ANOVA                         | Dunnett's T3 test                      | wt vs $7b^{-/-}$                  | $P = 0.3174$ |
|         |                                                         |                                       | Dunnett's T3 test                      | wt vs $7a^{-/-};7b^{-/-}$         | $P = 0.788$  |
| Fig S2J | wt: n=80; $7a^{-/-};7b^{-/-}$ : n=75                    | two-sided Fisher's Exact test         |                                        |                                   | $P = 0.1179$ |
| Fig S3B | sibling: n=28; $7a^{-/-}$ : n=26                        | two-tailed unpaired Mann-Whitney test |                                        |                                   | $P = 0.229$  |
| Fig S3C | sibling: n=28; $7a^{-/-}$ : n=26                        | two-tailed unpaired Student's t-test  |                                        |                                   | $P = 0.7463$ |
| Fig S3D | sibling: n=33; $7a^{-/-}$ : n=27                        | two-tailed unpaired Mann-Whitney test |                                        |                                   | $P = 0.4228$ |
| Fig S3E | sibling: n=33; $7a^{-/-}$ : n=27                        | two-tailed unpaired Student's t-test  |                                        |                                   | $P = 0.7002$ |
| Fig S4E | ctr MO: n=52<br>$7a$ MO: n=50                           | Two-way ANOVA                         | Bonferroni's multiple comparisons test | 1 dpi: cMO vs $7a$ MO             | $P = 0.9585$ |
|         |                                                         |                                       |                                        | 3 dpi: cMO vs $7a$ MO             | $P = 0.0037$ |
|         |                                                         |                                       |                                        | 5 dpi: cMO vs $7a$ MO             | $P = 0.0012$ |
|         |                                                         |                                       |                                        | 7 dpi: cMO vs $7a$ MO             | $P = 0.0003$ |
| Fig S4F | $hsp-7a$ : n=45<br>$hsp-tdTomato$ : n=25                | Two-way ANOVA                         | Bonferroni's multiple comparisons test | 1 dpi: $hsp-7a$ vs $hsp-tdTomato$ | $P > 0.9999$ |
|         |                                                         |                                       |                                        | 3 dpi: $hsp-7a$ vs $hsp-tdTomato$ | $P = 0.0323$ |
|         |                                                         |                                       |                                        | 5 dpi: $hsp-7a$ vs $hsp-tdTomato$ | $P = 0.0021$ |
| Fig S4G | $hsp-7a$ : n=35                                         | Two-way ANOVA                         | Bonferroni's multiple                  | 0 dpi: $hsp-7a$ vs $hsp-tdTomato$ | $P > 0.9999$ |

|          |                                         |                                       |                                        |                                             |            |
|----------|-----------------------------------------|---------------------------------------|----------------------------------------|---------------------------------------------|------------|
|          | <i>hsp-tdTomato</i> : n=35              |                                       | comparisons test                       | 1 dpi: <i>hsp-7a</i> vs <i>hsp-tdTomato</i> | $P=0.0031$ |
|          |                                         |                                       |                                        | 3 dpi: <i>hsp-7a</i> vs <i>hsp-tdTomato</i> | $P=0.0062$ |
|          |                                         |                                       |                                        | 5 dpi: <i>hsp-7a</i> vs <i>hsp-tdTomato</i> | $P=0.0029$ |
|          |                                         |                                       |                                        | 7 dpi: <i>hsp-7a</i> vs <i>hsp-tdTomato</i> | $P=0.2866$ |
| Fig EV1E | straight: wt: n=23, $7a^{-/-}$ : n=21   | two-tailed unpaired Student's t-test  |                                        | straight: wt vs $7a^{-/-}$                  | $P=0.0006$ |
|          | curved: wt: n=23, $7a^{-/-}$ : n=23     | two-tailed unpaired Student's t-test  |                                        | curved: wt vs $7a^{-/-}$                    | $P=0.0487$ |
| Fig EV1F | straight: wt: n=23, $7a^{-/-}$ : n=21   | two-tailed unpaired Student's t-test  |                                        | straight: wt vs $7a^{-/-}$                  | $P=0.0005$ |
|          | curved: wt: n=23, $7a^{-/-}$ : n=23     | two-tailed unpaired Student's t-test  |                                        | curved: wt vs $7a^{-/-}$                    | $P=0.0487$ |
| Fig EV1G | straight<br>wt: n=23, $7a^{-/-}$ : n=21 | Two-way ANVOA                         | Bonferroni's multiple comparisons test | active:<br>wt vs $7a^{-/-}$                 | $P=0.0029$ |
|          |                                         |                                       | Bonferroni's multiple comparisons test | static<br>wt vs $7a^{-/-}$                  | $P=0.0029$ |
|          | curved<br>wt: n=23, $7a^{-/-}$ : n=23   | Two-way ANVOA                         | Bonferroni's multiple comparisons test | active<br>wt vs $7a^{-/-}$                  | $P=0.0222$ |
|          |                                         |                                       | Bonferroni's multiple comparisons test | static<br>wt vs $7a^{-/-}$                  | $P=0.0224$ |
| Fig EV1I | straight<br>wt: n=58, $7a^{-/-}$ : n=38 | two-tailed unpaired Mann-Whitney test |                                        | wt straight vs wt curved                    | $P=0.0773$ |
|          |                                         | two-tailed unpaired Mann-Whitney test |                                        | $7a^{-/-}$ straight vs $7a^{-/-}$ curved    | $P=0.0022$ |
|          | curved<br>wt: n=32, $7a^{-/-}$ : n=61   | two-tailed unpaired Mann-Whitney test |                                        | wt straight vs $7a^{-/-}$ straight          | $P<0.0001$ |
|          |                                         | two-tailed unpaired Student's t-test  |                                        | wt curved vs $7a^{-/-}$ curved              | $P<0.0001$ |
| Fig EV1J | straight<br>wt: n=49, $7a^{-/-}$ : n=31 | two-tailed unpaired Student's t-test  |                                        | wt straight vs wt curved                    | $P=0.1086$ |
|          |                                         | two-tailed unpaired Student's t-test  |                                        | $7a^{-/-}$ straight vs $7a^{-/-}$ curved    | $P=0.1459$ |
|          | curved<br>wt: n=31, $7a^{-/-}$ : n=41   | two-tailed unpaired Student's t-test  |                                        | wt straight vs $7a^{-/-}$ straight          | $P<0.0001$ |
|          |                                         | two-tailed unpaired Student's t-test  |                                        | wt curved vs $7a^{-/-}$ curved              | $P<0.0001$ |
| Fig EV2C | axons: wt: n=48, $7a^{-/-}$ : n=43      | two-sided Fisher's Exact test         |                                        |                                             | $P=0.6444$ |

|          |                                           |                                       |                                                        |
|----------|-------------------------------------------|---------------------------------------|--------------------------------------------------------|
|          | glia: wt: n=48, $7a^{-/-}$ : n=43         | two-sided Fisher's Exact test         | $P=0.8285$                                             |
| Fig EV2D | wt: n=35; $7a^{-/-}$ : n=27               | two-tailed unpaired Mann-Whitney test | $P=0.4089$                                             |
| Fig EV2F | straight                                  | two-tailed unpaired Student's t-test  | wt straight vs wt curved<br>$P=0.0696$                 |
|          | wt: n=12, $7a^{-/-}$ : n=31               | two-tailed unpaired Student's t-test  | $7a^{-/-}$ straight vs $7a^{-/-}$ curved<br>$P=0.0886$ |
|          | curved                                    | two-tailed unpaired Student's t-test  | wt straight vs $7a^{-/-}$ straight<br>$P=0.0233$       |
|          | wt: n=27, $7a^{-/-}$ : n=31               | two-tailed unpaired Student's t-test  | wt curved vs $7a^{-/-}$ curved<br>$P=0.0299$           |
| Fig EV5B | ctr MO: n=16 cells<br>$7a$ MO: n=24 cells | two-tailed unpaired Mann-Whitney test | $P=0.0017$                                             |
| Fig EV5E | ctr MO: n=15 cells<br>$7a$ MO: n=23 cells | two-tailed unpaired Student's t-test  | $P=0.0056$                                             |
